# Supplementary material
Source: Springer Nature journal article supplement (https://www.springermedizin.de/resource/supplementary/12889_2009_2537_MOESM2_ESM.pdf/9486342)

Age 18 months

Age 36 months

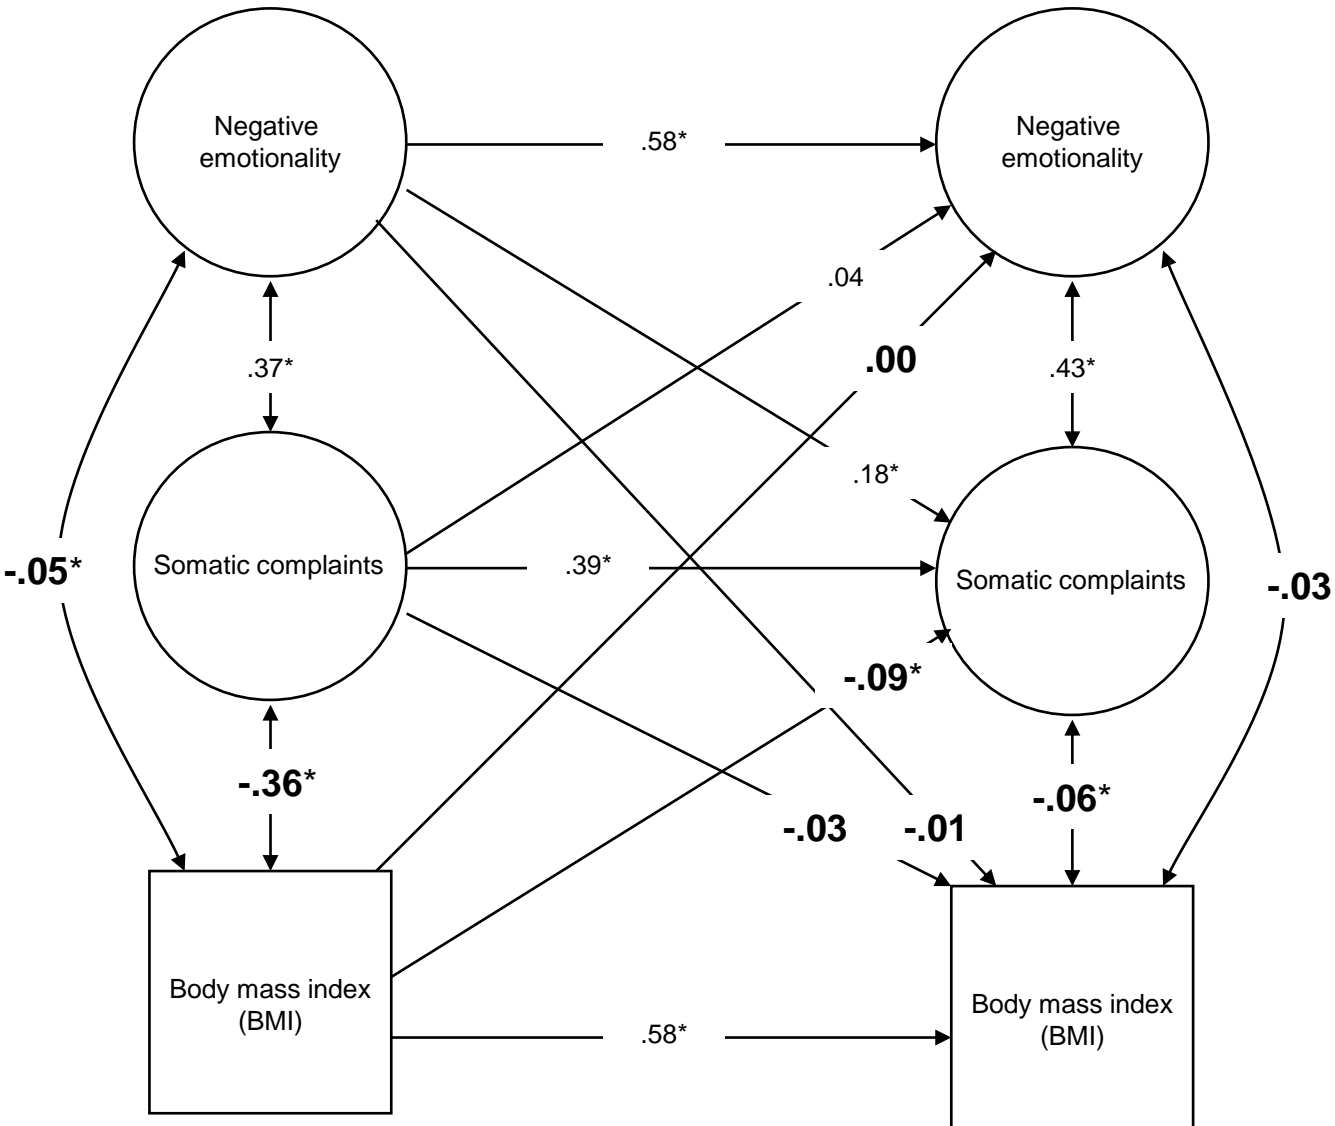

Supplement: MOESM2 [file 9486342]
